# Supplementary material for: Neprilysin-dependent neuropeptide Y cleavage in the liver promotes fibrosis by blocking NPY-receptor 1
Source: PubMed Central journal article supplement — Cell Rep. 2023 Jan 31;42(2):112059. doi: 10.1016/j.celrep.2023.112059 (PMC9989826; doi:10.1016/j.celrep.2023.112059), 2023-01-31
Supplement: mmc1.pdf [file mmc1.pdf]

**Supplemental information**

**Neprilysin-dependent neuropeptide Y cleavage**

**in the liver promotes fibrosis**

**by blocking NPY-receptor 1**

**Cristina Ortiz, Sabine Klein, Winfried H. Reul, Fernando Magdaleno, Stefanie Gröschl, Peter Dietrich, Robert Schierwagen, Frank E. Uchner, Sandra Torres, Christoph Hieber, Caroline Meier, Nico Kraus, Olaf Tyc, Maximilian Brol, Stefan Zeuzem, Christoph Welsch, Marco Poglitsch, Claus Hellerbrand, Mercedes Alfonso-Prieto, Fabio Mira, Ulrich auf dem Keller, Anja Tetzner, Andrew Moore, Thomas Walther, and Jonel Trebicka**

1 **SUPPLEMENTARY RESULTS**

2 **Supplementary Table 1. Statistics of the top best cluster for each of the HADDOCK**  
 3 **docking runs performed**

4

|                                                                                   | <b>NPY C-terminal fragments</b>  |                                  |
|-----------------------------------------------------------------------------------|----------------------------------|----------------------------------|
|                                                                                   | <b>Y<sub>1</sub>R-NPY(21-36)</b> | <b>Y<sub>1</sub>R-NPY(31-36)</b> |
| Cluster rank                                                                      | 1                                | 1                                |
| Cluster population                                                                | <b>112</b>                       | <b>197</b>                       |
| HADDOCK score* (a.u.)                                                             | -141.0 ± 13.6                    | -123.8 ± 8.2                     |
| RMSD from the overall lowest energy structure (Å)                                 | 0.7 ± 0.5                        | 0.7 ± 0.4                        |
| Intermolecular van der Waals energy (E <sub>vdw</sub> )(kcal mol <sup>-1</sup> )  | -59.7 ± 5.4                      | -52.2 ± 3.6                      |
| Intermolecular electrostatic energy (E <sub>elec</sub> )(kcal mol <sup>-1</sup> ) | -219.0 ± 56.0                    | -172.4 ± 30.8                    |
| Desolvation energy (E <sub>desol</sub> )(kcal mol <sup>-1</sup> )                 | -6.0 ± 7.5                       | -15.4 ± 5.9                      |
| Restraints violation energy (E <sub>AIR</sub> )(kcal mol <sup>-1</sup> )          | 791.4 ± 96.57                    | 682.2 ± 74.21                    |
| Buried surface area (Å <sup>2</sup> )                                             | 1799.1 ± 55.6                    | 1459.9 ± 10.1                    |
| Z-score                                                                           | -1.3                             | 0.0                              |
| Distance between Gln120-Tyr36 (Å)                                                 | 9.4                              | 11.88                            |

5

6 \*The HADDOCK score is defined as 1.0 E<sub>vdw</sub> + 0.2 E<sub>elec</sub> + 1.0 E<sub>desol</sub> + 0.1 E<sub>AIR</sub>.

7 **Supplementary Table 2. List of commercially available antibodies used**

| <b>Name</b> | <b>CAT #</b> | <b>Company</b>           |
|-------------|--------------|--------------------------|
| Col1a1      | 1310-01      | Southern Biotech         |
| αSMA        | ab5694       | Abcam plc, Cambridge     |
| GAPDH       | sc-25778     | Santa Cruz Biotechnology |
| SMAD2       | D43B4        | Cell Signaling           |
| SMAD3       | C67H9        | Cell Signaling           |
| pSMAD2      | 138D4        | Cell Signaling           |
| pSMAD3      | C25A9        | Cell Signaling           |
| RhoA        | sc-418       | Santa Cruz Biotechnology |
| ROCK2       | sc-5561      | Santa Cruz Biotechnology |
| PCNA        | sc-56        | Santa Cruz Biotechnology |
| p-Moesin    | sc-12895     | Santa Cruz Biotechnology |

|     |        |                 |
|-----|--------|-----------------|
| NPY | 11976S | Cell Signalling |
|-----|--------|-----------------|

8

9

10 **Supplementary Table 3. Primer sequences**

11

| Gene name                      | Assay ID      | Specie              |
|--------------------------------|---------------|---------------------|
| <i>acta2</i>                   | Mm00725412_s1 | <i>Mus musculus</i> |
| <i>col1a1</i>                  | Mm00801666_g1 | <i>Mus musculus</i> |
| <i>edn-1</i>                   | Mm00438656_m1 | <i>Mus musculus</i> |
| <i>edn-2</i>                   | Mm00432983_m1 | <i>Mus musculus</i> |
| <i>ednra</i>                   | Mm01243722_m1 | <i>Mus musculus</i> |
| <i>ednrb</i>                   | Mm00432989_m1 | <i>Mus musculus</i> |
| <i>npy</i>                     | Mm01410146_m1 | <i>Mus musculus</i> |
| <i>Nep (MME)</i>               | Mm00485028_m1 | <i>Mus musculus</i> |
| <i>npyr1</i>                   | Mm00650798-g1 | <i>Mus musculus</i> |
| <i>npyr2</i>                   | Mm01956783_s1 | <i>Mus musculus</i> |
| <i>npyr5</i>                   | Mm02620267-s1 | <i>Mus musculus</i> |
| <i>tgf<math>\beta</math>-1</i> | Mm03024053_m1 | <i>Mus musculus</i> |
| <i>vegfa</i>                   | Mm00437306_m1 | <i>Mus musculus</i> |
| <i>F4/80</i>                   | Mm00802529_m1 | <i>Mus musculus</i> |
| <i>Arg1</i>                    | Mm00475988_m1 | <i>Mus musculus</i> |
| <i>Ccr2</i>                    | Mm99999051_gH | <i>Mus musculus</i> |
| <i>Fap</i>                     | Mm01329175_m1 | <i>Mus musculus</i> |
| <i>Dpp4</i>                    | Mm00494552_m1 | <i>Mus musculus</i> |
| <i>MME</i>                     | Hs00153510_m1 | <i>Homo sapiens</i> |
| <i>Npyr1</i>                   | Hs00702150_s1 | <i>Homo sapiens</i> |
| <i>Npyr2</i>                   | Hs01921296_s1 | <i>Homo sapiens</i> |
| <i>Npyr5</i>                   | Hs01883189_s1 | <i>Homo sapiens</i> |

12

13 **Supplementary Table 4. Complete list of restraints used in the information-driven**14 **docking of the C-terminal fragments NPY(21-36) and NPY(31-36) to Y<sub>1</sub>R.**

|                                           |
|-------------------------------------------|
| <b>1. Experimentally-based restraints</b> |
|-------------------------------------------|

|                                                                                                                                                                                                    |
|----------------------------------------------------------------------------------------------------------------------------------------------------------------------------------------------------|
| <i>NPY(31-36)/Y<sub>1</sub>R</i> : Y36-Y100 <sup>2.64</sup> , Y36-W106 <sup>ECL1</sup> , Y36-Q120 <sup>3.32</sup> , R35-N283 <sup>6.55</sup> , R35-D287 <sup>6.59</sup> , R33-N299 <sup>7.32</sup> |
|----------------------------------------------------------------------------------------------------------------------------------------------------------------------------------------------------|

|                                                                                                                                                                                                                                                          |
|----------------------------------------------------------------------------------------------------------------------------------------------------------------------------------------------------------------------------------------------------------|
| <i>NPY(21-36)/Y<sub>1</sub>R</i> : Y36-Y100 <sup>2.64</sup> , Y36-W106 <sup>ECL1</sup> , Y36-Q120 <sup>3.32</sup> , R35-N283 <sup>6.55</sup> , R35-D287 <sup>6.59</sup> , R33-N299 <sup>7.32</sup> , L30-I293 <sup>ECL3</sup> , R25-D104 <sup>2.67</sup> |
|----------------------------------------------------------------------------------------------------------------------------------------------------------------------------------------------------------------------------------------------------------|

|                                    |
|------------------------------------|
| <b>2. Fpocket-based restraints</b> |
|------------------------------------|

|                                                                                                                                                                                                                                                                                                                                                                                                                                                              |
|--------------------------------------------------------------------------------------------------------------------------------------------------------------------------------------------------------------------------------------------------------------------------------------------------------------------------------------------------------------------------------------------------------------------------------------------------------------|
| <i>NPY(31-36)</i> or <i>NPY(21-36)</i> : all residues of the corresponding fragment<br><br><i>Y<sub>1</sub>R</i> : D31, C33, C93, C94, T97, Y100, T101, D104, W106, C113, N116, P117, Q120, C121, I124, F173, Q177, P183, F184, N186, V187, K195, V197, C198, F199, D200, F202, R208, Y211, T212, C215, C216, Q219, Y220, F272, W276, C279, T280, F282, N283, T284, F286, D287, N289, H290, Q291, I292, I293, A294, T295, C296, H298, N299, F302, H306, M310 |
| <b>3. Center of mass restraint</b>                                                                                                                                                                                                                                                                                                                                                                                                                           |
| <i>NPY(31-36)</i> or <i>NPY(21-36)</i> : center of all C $\alpha$ atoms<br><br><i>Y<sub>1</sub>R</i> : center of all C $\alpha$ atoms                                                                                                                                                                                                                                                                                                                        |
| <b>4. Extracellular loop-based restraints</b>                                                                                                                                                                                                                                                                                                                                                                                                                |
| <i>NPY(21-36)</i> : residues 21-32<br><br><i>Y<sub>1</sub>R</i> : residues 105-108 (ECL1) and residues 290-294 (ECL3)                                                                                                                                                                                                                                                                                                                                        |

15

16 1. The experimentally-based restraints were derived from references<sup>25,44</sup>. Here, the first  
17 number indicates the residue of the NPY fragment, while the second corresponds to Y<sub>1</sub>R; for  
18 the latter, both the human Y<sub>1</sub>R sequence numbering and the Ballesteros-Weinstein numbering  
19 for class A GPCRs are given. The experimentally-based restraints were defined as  
20 unambiguous restraints, i.e. they are enforced in all the docking structures.

21 2. The fpocket-based restraints involve all residues of the corresponding NPY fragment and  
22 the Y<sub>1</sub>R residues predicted to be part of the binding cavity by fpocket<sup>45,46</sup>. Therefore, only the  
23 fpocket-predicted residues are explicitly listed. These computationally-based restraints were  
24 defined as ambiguous restraints, so that 50% of them are randomly deleted in each docking  
25 trial in order to minimize any possible artefact due to an incorrectly predicted binding cavity  
26 residue.

27 Nevertheless, we would like to note here that residues Y100, N283, D287, I293 and N299,  
28 which have been experimentally proven to interact with the C-terminal part of NPY<sup>25</sup>, are also  
29 predicted by fpocket as part of the binding cavity, providing support to the computational  
30 prediction.

31 3. The center of mass restraint is an ambiguous distance restraint between the centers of the  
32 two molecules. The center of each molecule is defined as the average of all its C $\alpha$  atoms<sup>47</sup>.

33 4. The ECL-based restraints were chosen based on the putative positioning of the central  $\alpha$ -  
34 helix (A14-T32) near the Y<sub>1</sub>R extracellular loops ECL1 and ECL3<sup>25</sup>. In particular, the ECL-  
35 based restraints involve the residues of the NPY(21-36) fragment forming part of the central  
36  $\alpha$ -helix (residues 21-32) and the Y<sub>1</sub>R residues belonging to ECL1 and ECL3 (residues 105-108  
37 and 290-294, respectively, according to the GPCR database  
38 ([www.gpcrdb.org/protein/npy1r\\_human/](http://www.gpcrdb.org/protein/npy1r_human/))). These ECL-based restraints were defined as  
39 unambiguous restraints, as are the fpocket-based restraints, except that the upper limit of the  
40 effective distance was increased from 2.0 Å (default value) to 5.0 Å. In this way, the central  $\alpha$ -  
41 helix can be guided towards the extracellular loops, but without necessarily enforcing a direct  
42 interaction.

43

44 SUPPLEMENTARY FIGURES

45

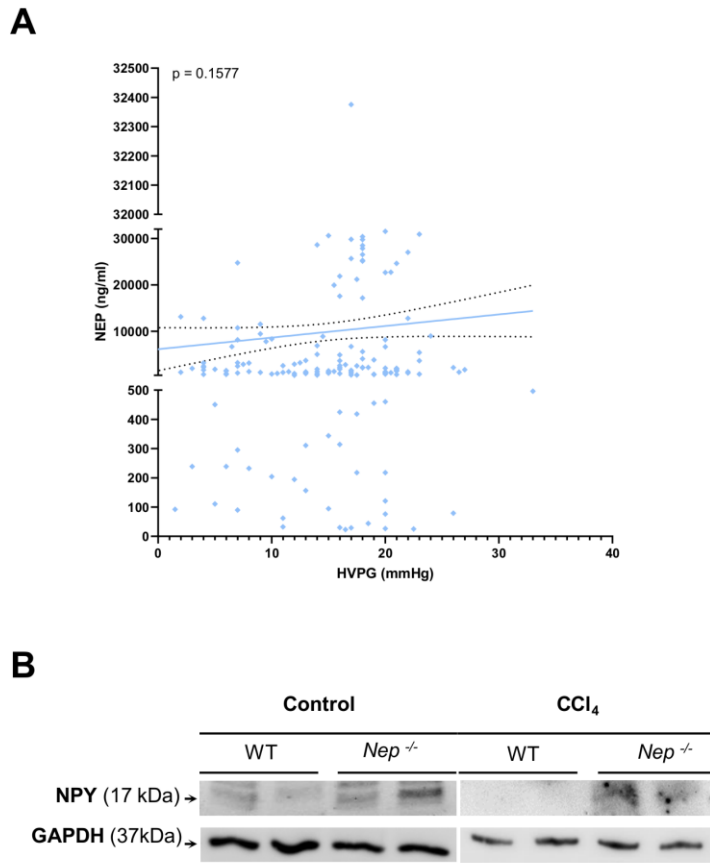

46

47

48

49 **Supplementary Figure 1. Correlation of NEP levels and portal hypertension in patients**  
50 **with cirrhosis. (A)** A simple linear regression with 95% confidence interval was made to show  
51 the trend between NEP levels and hepatic venous pressure gradient (HVPG) in 125 cirrhosis  
52 patients. *p* value and *r*=0.1029 were calculated with non-parametric (Spearman) correlation.  
53 **(B)** Western blot analysis of NPY protein from controls vs. CCl<sub>4</sub>-treated *Nep*<sup>-/-</sup> mice and WT  
54 mice. The expression of GAPDH was used as a loading control.

55

56

57

58

59

60

**A**

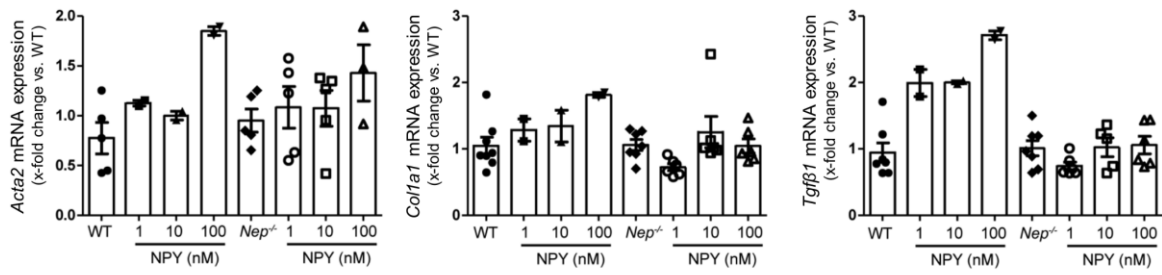

**B**

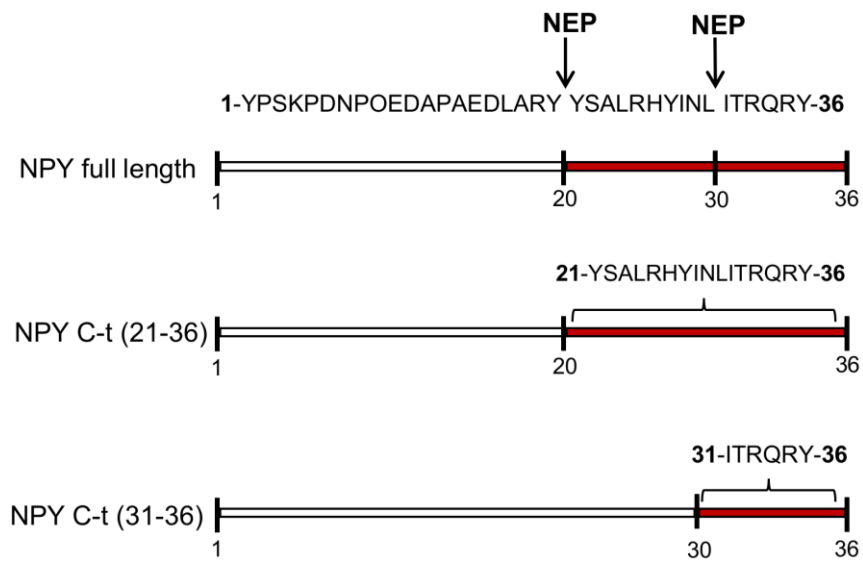

61  
62  
63  
64  
65  
66  
67  
68  
69  
70  
71  
72

**Supplementary Figure 2. Diagram of NPY and its fragments generated by NEP proteolysis. (A)** qPCR analysis from *Acta2*, *Col1a1* and *Tgfβ1* of HSCs from WT and *Nep*<sup>-/-</sup> mice treated with different NPY protein concentrations (1, 10 and 100nM) to determine the right dose of recombinant NPY protein. All data were normalized to the expression of *18sRNA*. **(B)** Illustration of full length NPY amino acid sequence showing the two potential cleavage sites for NEP and the two final NPY short peptides that are generated.

73  
74

**A**

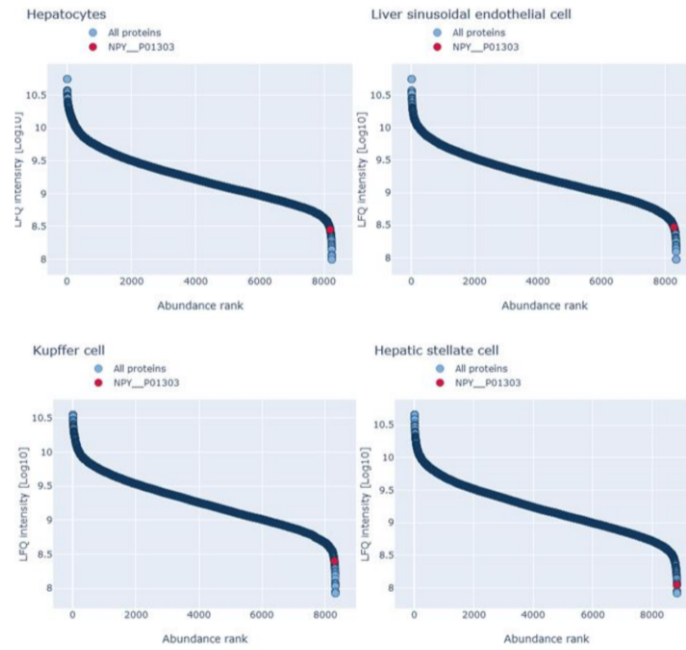

**B**

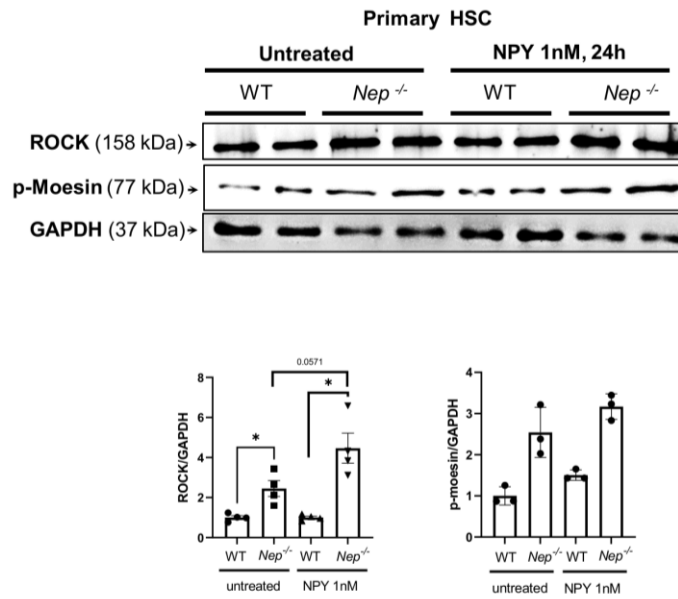

75

76 **Supplementary Figure 3. NPY abundance and its effect in HSC** (A) Analysis of abundance  
 77 of NPY protein in the different hepatic cell types. (B) Western blot from primary HSC isolated  
 78 from WT and *Nep*<sup>-/-</sup> mice treated with and without NPY 1 nM for 24 h. Results are expressed  
 79 as mean ± standard error of the mean (SEM); \**p*<0.05, \*\**p*<0.01 for NPY-treated vs.  
 80 corresponding control HSC.



**A** NPY Full-length (1-36)

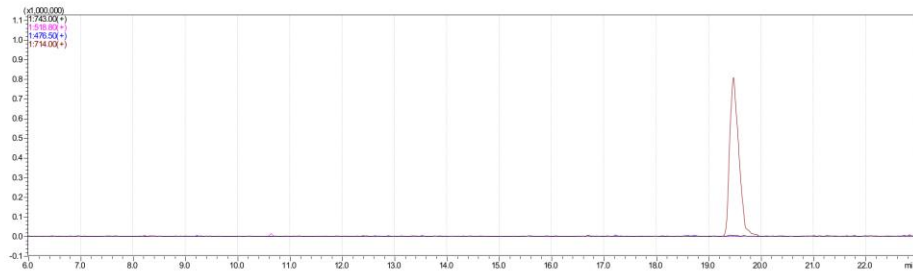

**B** NPY full-length incubated with recombinant NEP (1 hour)

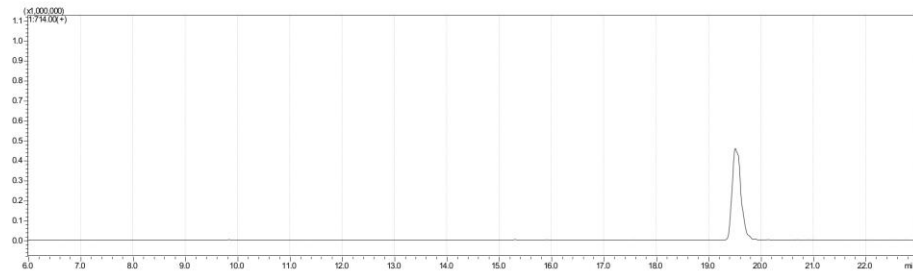

**C** NPY (21-36) CT1

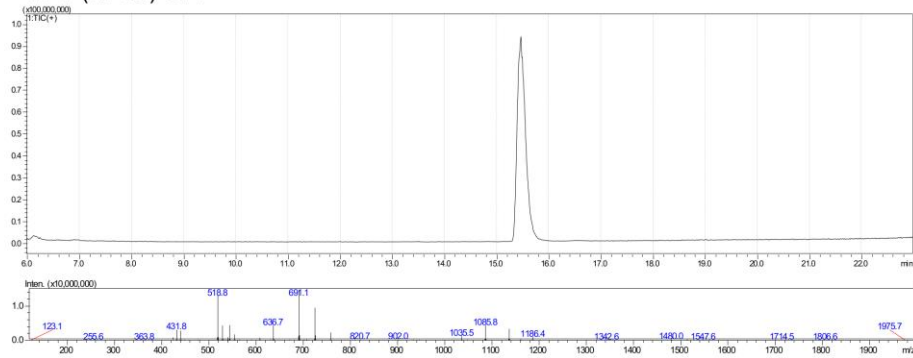

**D** NPY (31-36) CT2

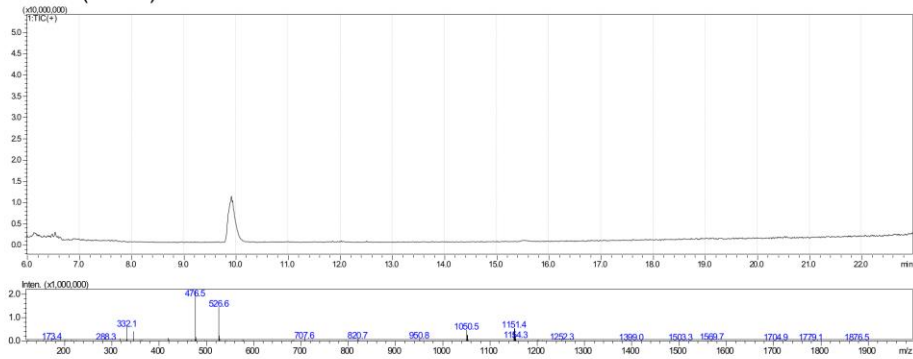

81

82 **Supplementary Figure 4. Characterization of NPY, NEP cleavage of NPY and NPY C-**  
83 **terminal short fragments. (A-D) LCMS measurements of NPY full length showing the elution**  
84 **profile. Incubation of NPY together with NEP for 1 h decreased the amount of NPY protein but**  
85 **the expected corresponding NPY short C-terminal fragments were not present. Synthetic NPY**  
86 **C-terminal fragments, (21-36) and (31-36), were run independently to analyze their retention**  
87 **times, stability, and specific m/z peaks.**

88  
89  
90

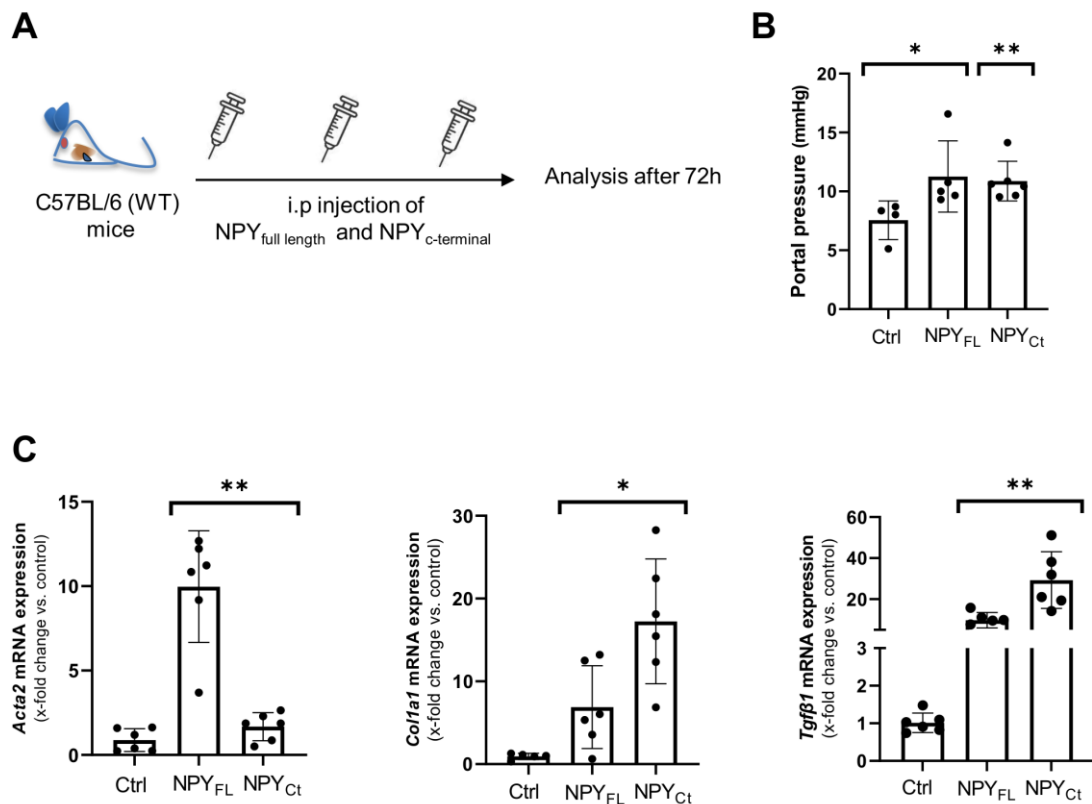

91  
92  
93  
94  
95  
96  
97  
98  
99  
100  
101  
102  
103  
104  
105  
106  
107  
108  
109  
110  
111  
112  
113  
114  
115  
116

**Supplementary Figure 5. *In vivo* effect in mice of full length NPY and its C-terminal fragments.** (A) Schematic representation of the mice treated for 72 hours with full length NPY and NPY C-terminal cleaved fragments. (B) Portal pressure measurements from the three different mice groups, (C) Hepatic *Acta2*, *col1a1* and *Tgfb1* mRNA expression of the different mice groups untreated and treated with full length NPY and its C-terminal fragments. All data were normalized to the expression of *18sRNA*. Results are expressed as mean  $\pm$  standard error of the mean (SEM), n=6/group.; \* $p$ <0.05, \*\* $p$ <0.01,

A

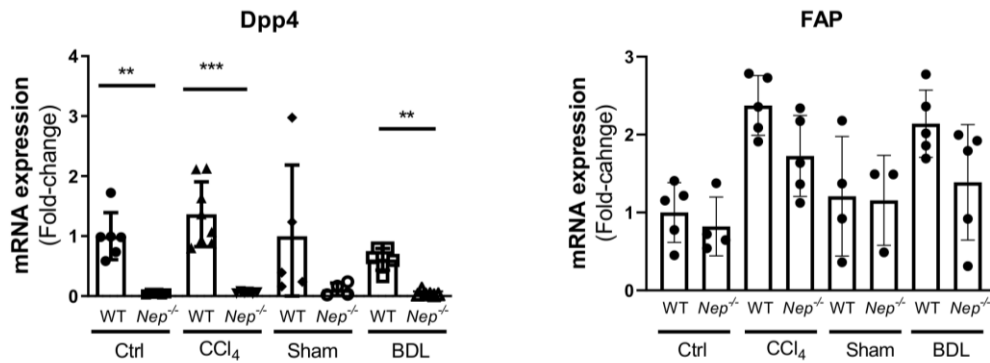

B

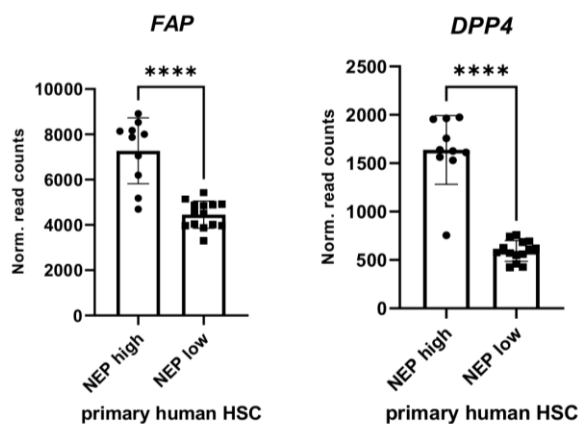

C

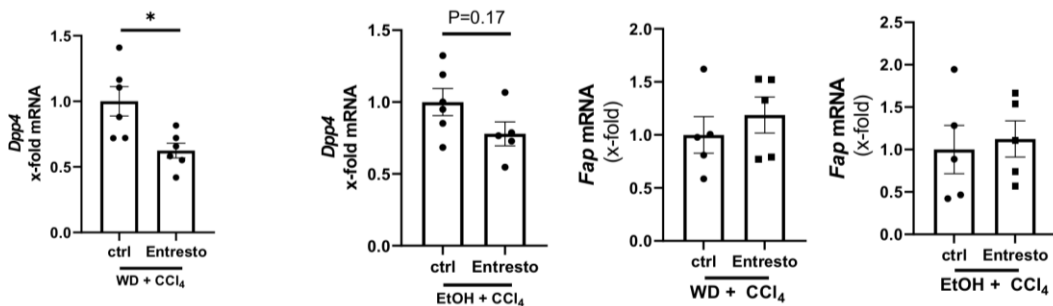

117  
118  
119  
120  
121  
122  
123  
124  
125  
126  
127  
128

**Supplementary Figure 6. Analysis of *Dpp4* and *FAP* expression.** (A) *Dpp4* and *FAP* mRNA expression in WT and CCl<sub>4</sub>- and BDL-treated *Nep*<sup>-/-</sup> mice. *Nep*<sup>-/-</sup>-treated mice showed decreased expression of *Dpp4* compared to WT mice. *FAP* was slightly reduced in *Nep*<sup>-/-</sup> mice. n=6/group. \*\**p*<0.01, \*\*\**p*<0.001. (B) Normalized read counts of *FAP* and *Dpp4* expression in human primary HSCs transcriptomic data. \*\*\*\**p*<0.0001. (C) mRNA expression of *Fap* and *Dpp4* in fibrotic WT mice treated with Entresto®. Mice treated with Entresto® showed no significant upregulation of *Fap* expression compared to the controls. *Dpp4* expression was significantly downregulated in mice treated with Entresto® compared to controls. All data were normalized to the expression of *18sRNA*. Results are expressed as mean ± standard error of the mean (SEM); \**p*<0.05.

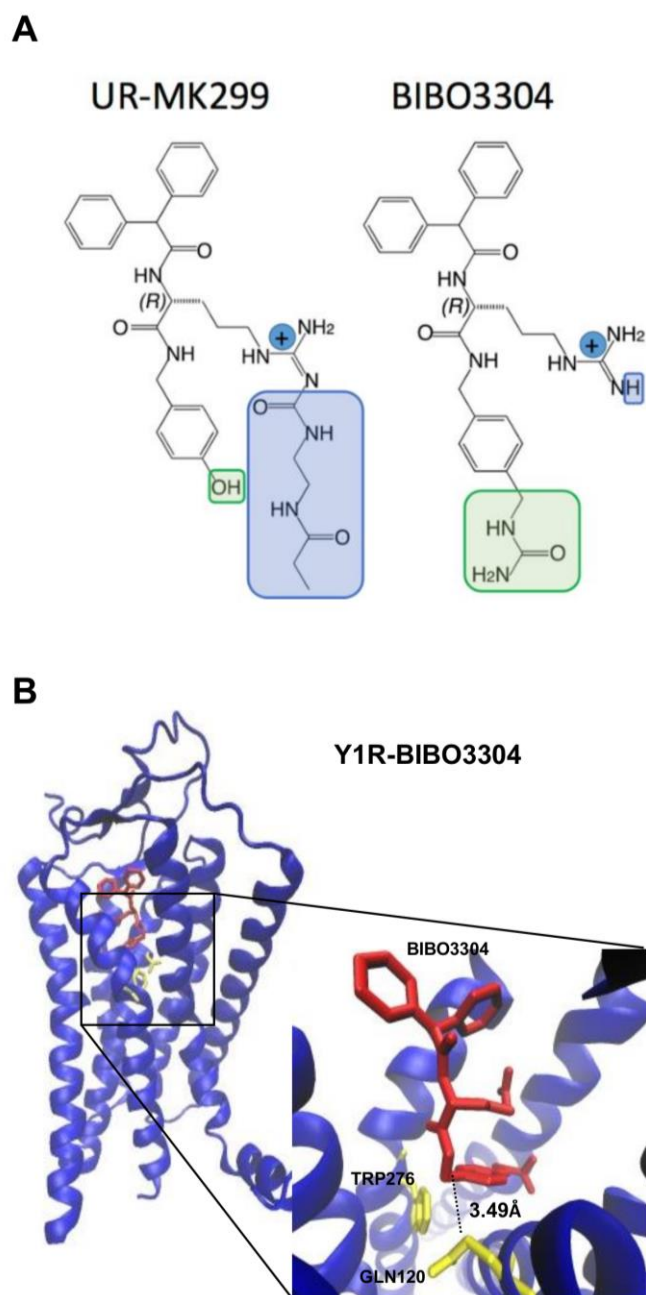

129

130 **Supplementary Figure 7. Comparison of the chemical structures of the antagonists**  
 131 **BIBO3304 and UR-MK299. (A)** The chemical structure of BIBO3304 is designed to mimic the  
 132 C-terminal NPY residues Arg35 and Tyr36 and shares the same scaffold with UR-MK299.  
 133 Hence, the model of the Y<sub>1</sub>R/BIBO3304 complex was built by manual modification of the  
 134 experimental structure of the Y<sub>1</sub>R/UR-MK299 complex (PDB code 5ZBQ) (1). In particular, the  
 135 carbamoyl tail (in blue) was removed from the guanidinium group, and the hydroxyl group (in  
 136 green) was replaced a methylurea group. **(B)** Manual docking of the antagonist used in this  
 137 work, BIBO3304. The Y<sub>1</sub>R inhibitor BIBO3304 is shown in red.

138

139

140

Sirius Red staining

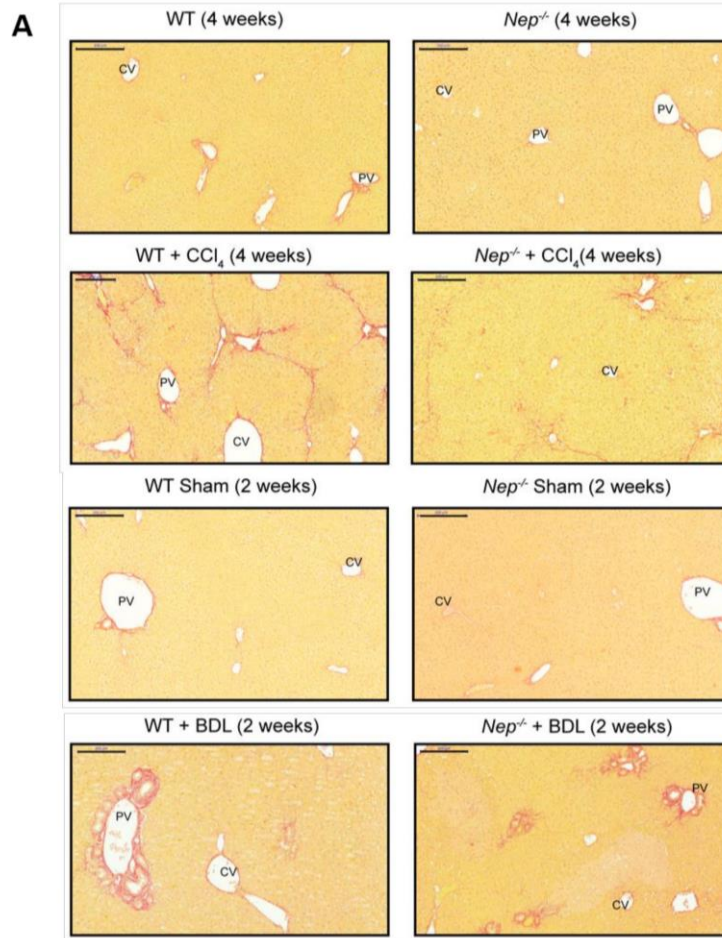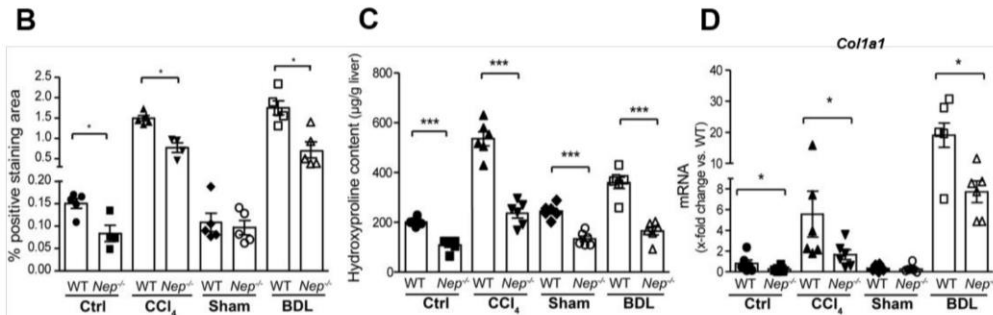

141

142 **Supplementary Figure 8. *Nep* deletion reduces fibrosis in BDL- and CCl<sub>4</sub>-treated mice.**

143 **(A-B)** Liver sections stained with Sirius red with their respective morphometric analysis.

144 Central vein (CV) and portal vein (PV). Scale bar: 200 µm. **(C)** Hepatic hydroxyproline content

145 and **(D)** hepatic *Col1a1* mRNA levels in BDL- and CCl<sub>4</sub>-treated *Nep*<sup>-/-</sup> mice compared to WT

146 mice, n=5/group. All data were normalized to the expression of *18S* RNA.

147

148

149

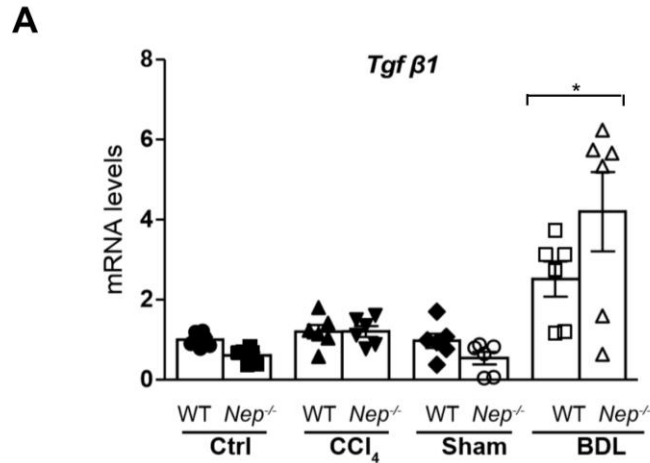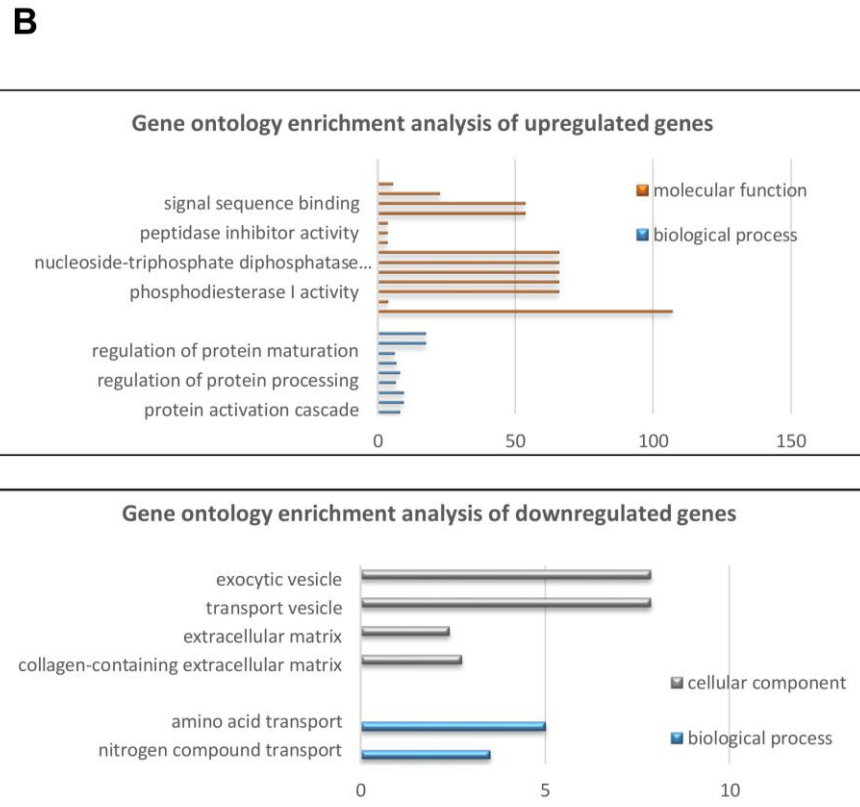

150

151 **Supplementary Figure 9. BDL-treated *Nep*<sup>-/-</sup> mice show increased expression of *Tgfβ1*.**  
 152 **(A)** *Tgfβ1* mRNA expression in WT and CCl<sub>4</sub>- and BDL-treated *Nep*<sup>-/-</sup> mice. BDL-*Nep*<sup>-/-</sup>-treated  
 153 mice showed increased expression of *Tgfβ1* compared to untreated mice, WT as well as *Nep*<sup>-/-</sup>.  
 154 All data were normalized to the expression of *18sRNA*. Results are expressed as mean ±  
 155 standard error of the mean (SEM); n=6/group. \**p*<0.05 for BDL-treated *Nep*<sup>-/-</sup> mice compared  
 156 to WT mice. **(B)** Gene Ontology analysis show the biological processes up/down regulated  
 157 when hepatic NEP is highly or down expressed.

158

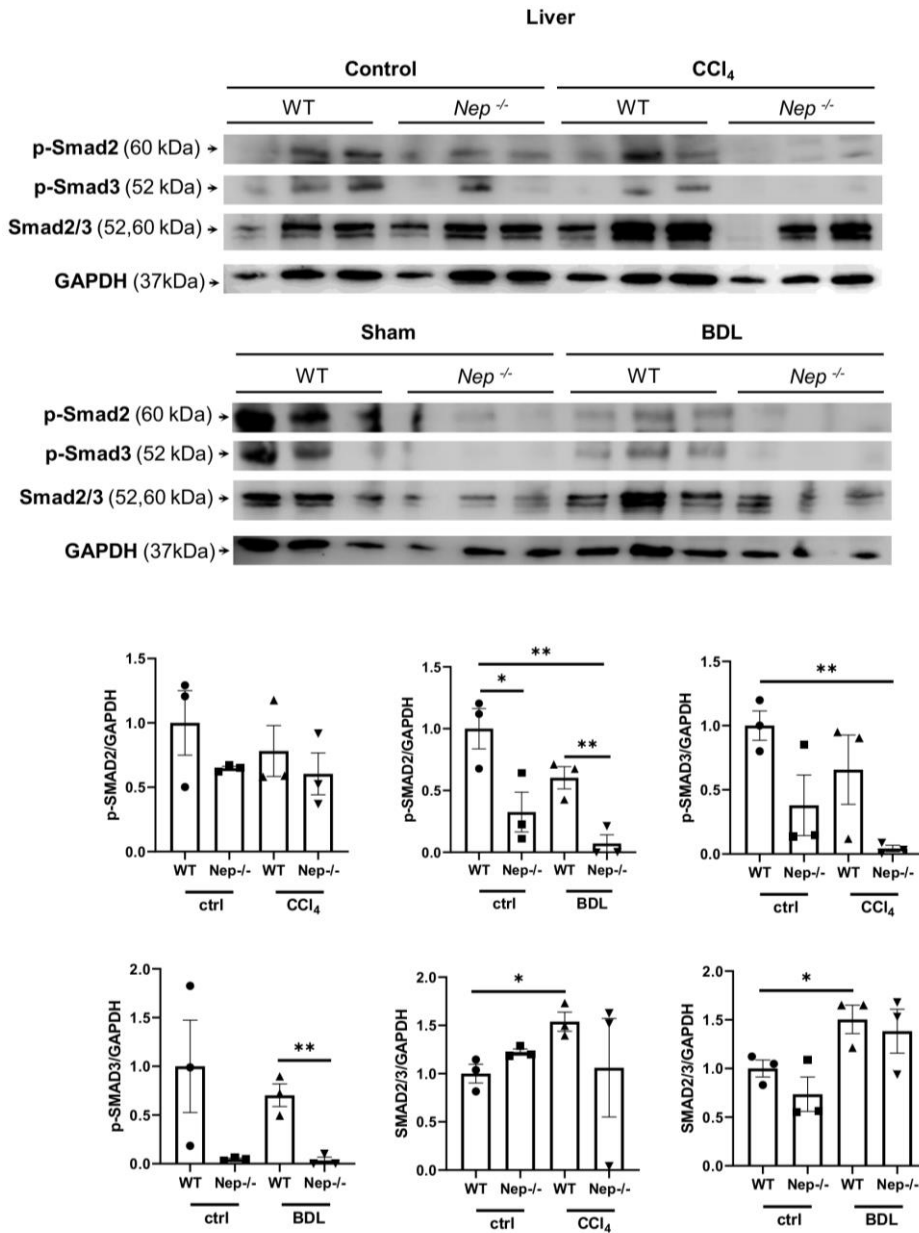

160

161 **Supplementary Figure 10. Downstream effectors of Tgfβ1 pathway are decreased in**  
 162 ***Nep*<sup>-/-</sup> mice. (A)** Western blot analysis of mice livers comparing the expression of SMAD2/3  
 163 and their phosphorylated forms (pSMAD2/3) between WT mice and *Nep*<sup>-/-</sup> control vs. BDL and  
 164 CCl<sub>4</sub>. **(B)** Corresponding quantification of the signals compared to the loading controls GAPDH.  
 165 Results are expressed as mean ± standard error of the mean (SEM); n=3/group. \*p<0.05 and  
 166 \*\*p<0.01.

167

168

169



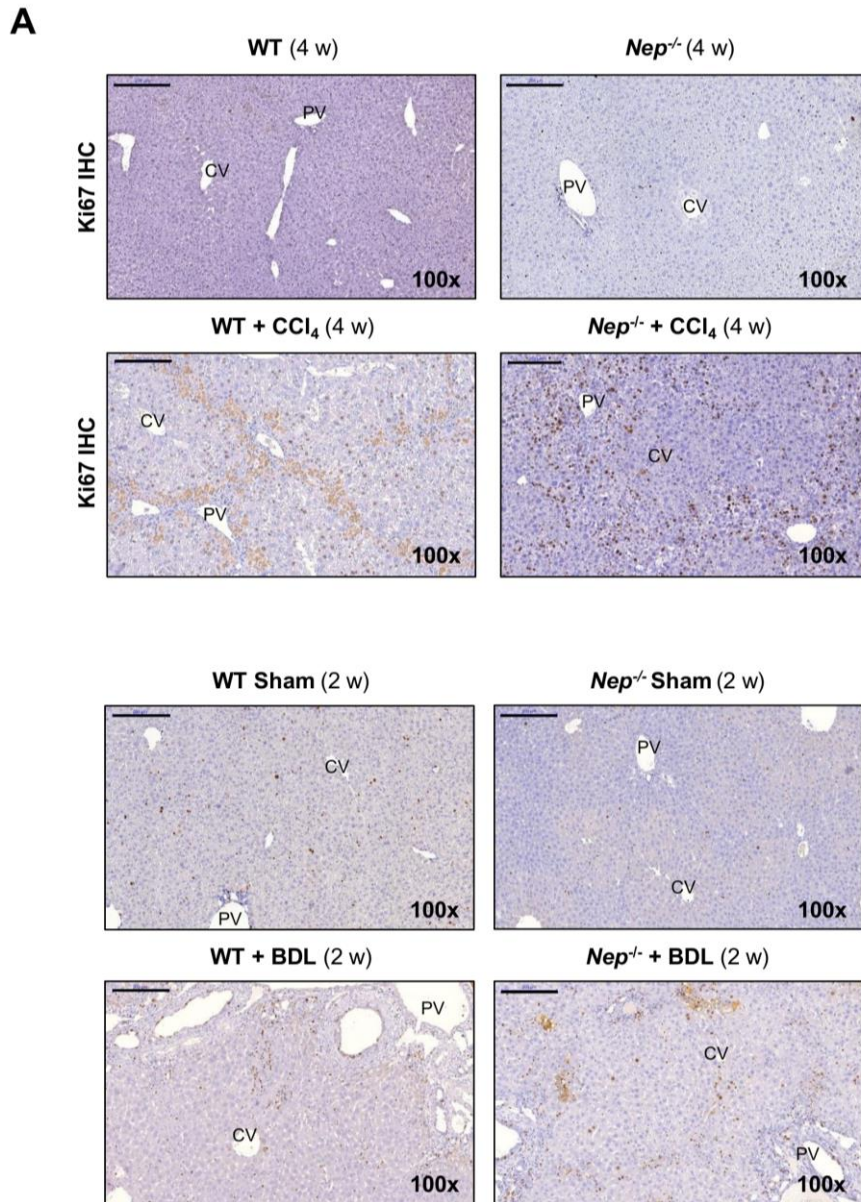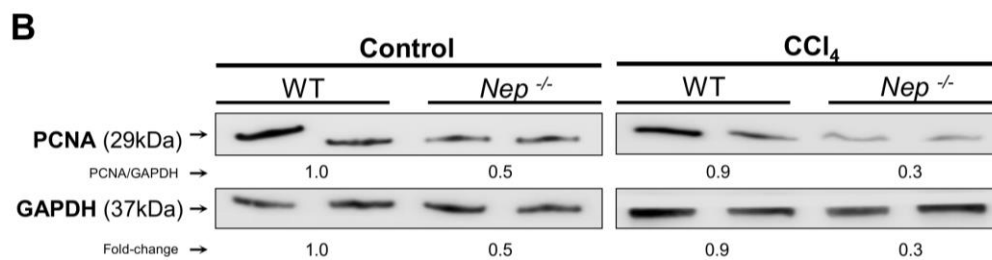

170

171

172

173

174

175

176

177

**Supplementary Figure 11. NEP deletion does not change proliferation in livers from BDL- and CCl<sub>4</sub>-treated *Nep*<sup>-/-</sup> mice compared to WT mice. (A) Ki67 IHC and (B) PCNA Western blot in CCl<sub>4</sub>-treated WT compared to control *Nep*<sup>-/-</sup> mice. Values are expressed as fold-change vs. control WT mice. Scale bar=200μm.**



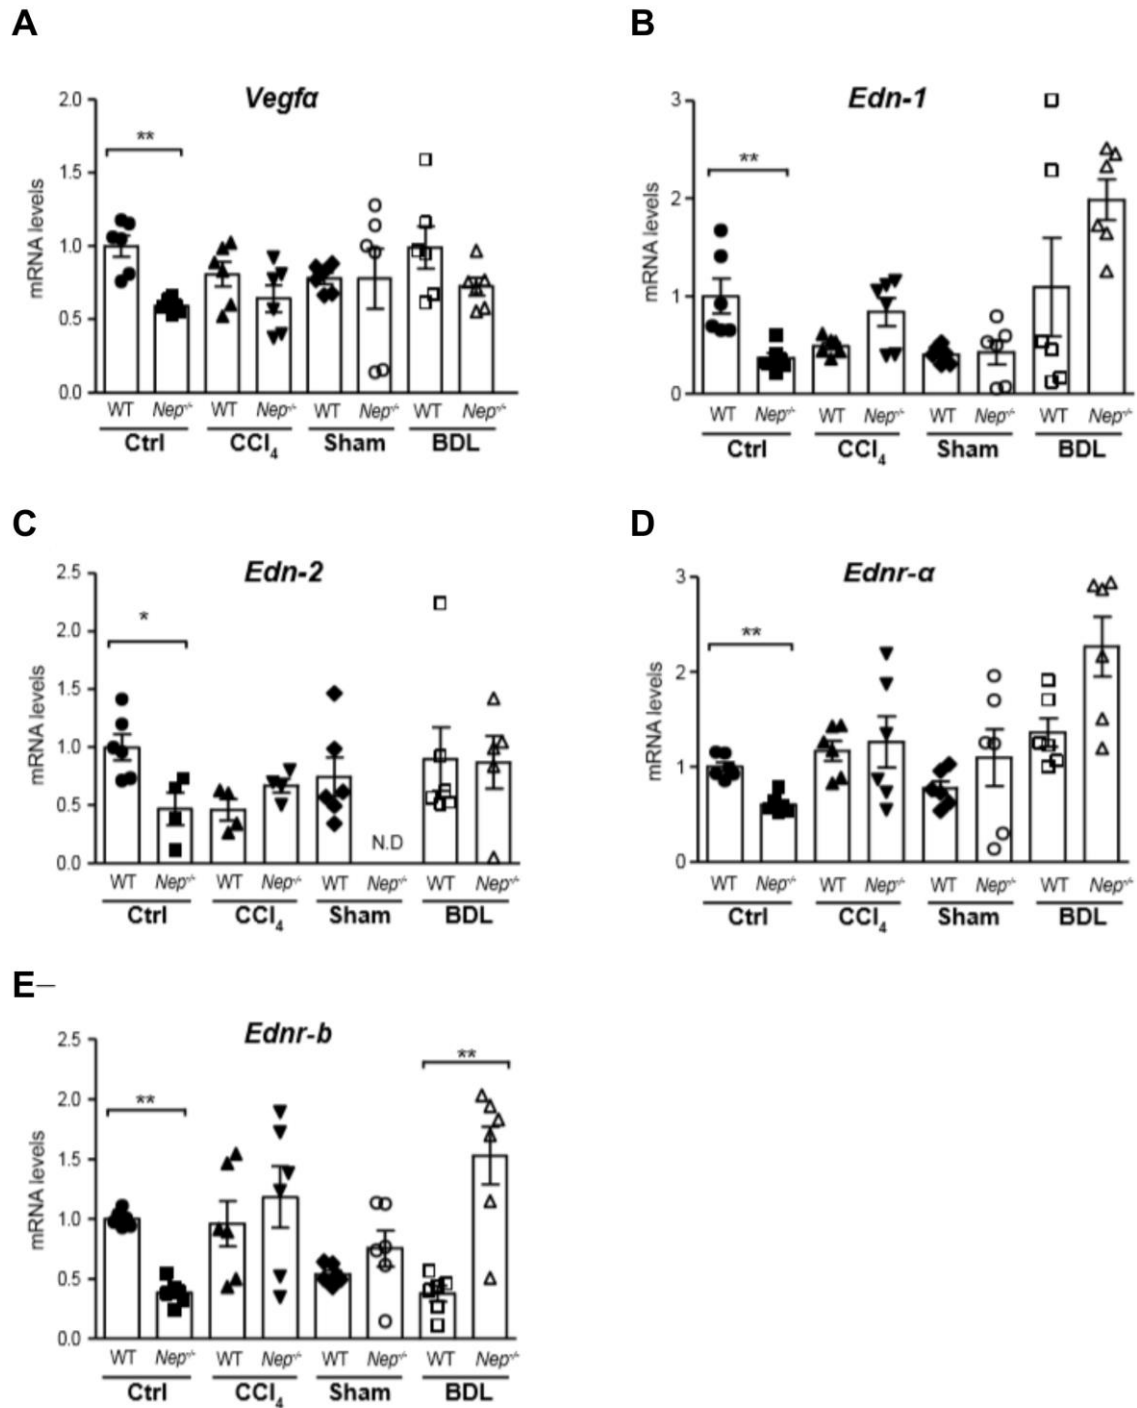

178

179 **Supplementary Figure 12. BDL- and CCl<sub>4</sub>-treated *Nep*<sup>-/-</sup> mice show no changes in *Vegfa*,**  
 180 ***Edn-1*, *Edn-2*, *Ednra* and *Ednrb* mRNA expression compared to WT mice. (A) qPCR from**  
 181 **liver lysates show unchanged *Vegfa* (vascular endothelial growth factor A) (B) *Edn1***  
 182 **(endothelin-1) (C) *Edn2* (endothelin-2) (D) *Ednra* (endothelin receptor type A) and (E) *Ednrb***  
 183 **(endothelin receptor type B) mRNA expression in BDL- and CCl<sub>4</sub>-treated *Nep*<sup>-/-</sup> mice compared**  
 184 **to WT mice. All data were normalized to the expression of *18sRNA*. Results are expressed as**  
 185 **mean ± standard error of the mean (SEM); n=6/group. \*p<0.05, \*\*p<0.01 for control WT vs.**  
 186 ***Nep*<sup>-/-</sup> mice and for BDL-treated WT vs. *Nep*<sup>-/-</sup> mice.**  
 187

188

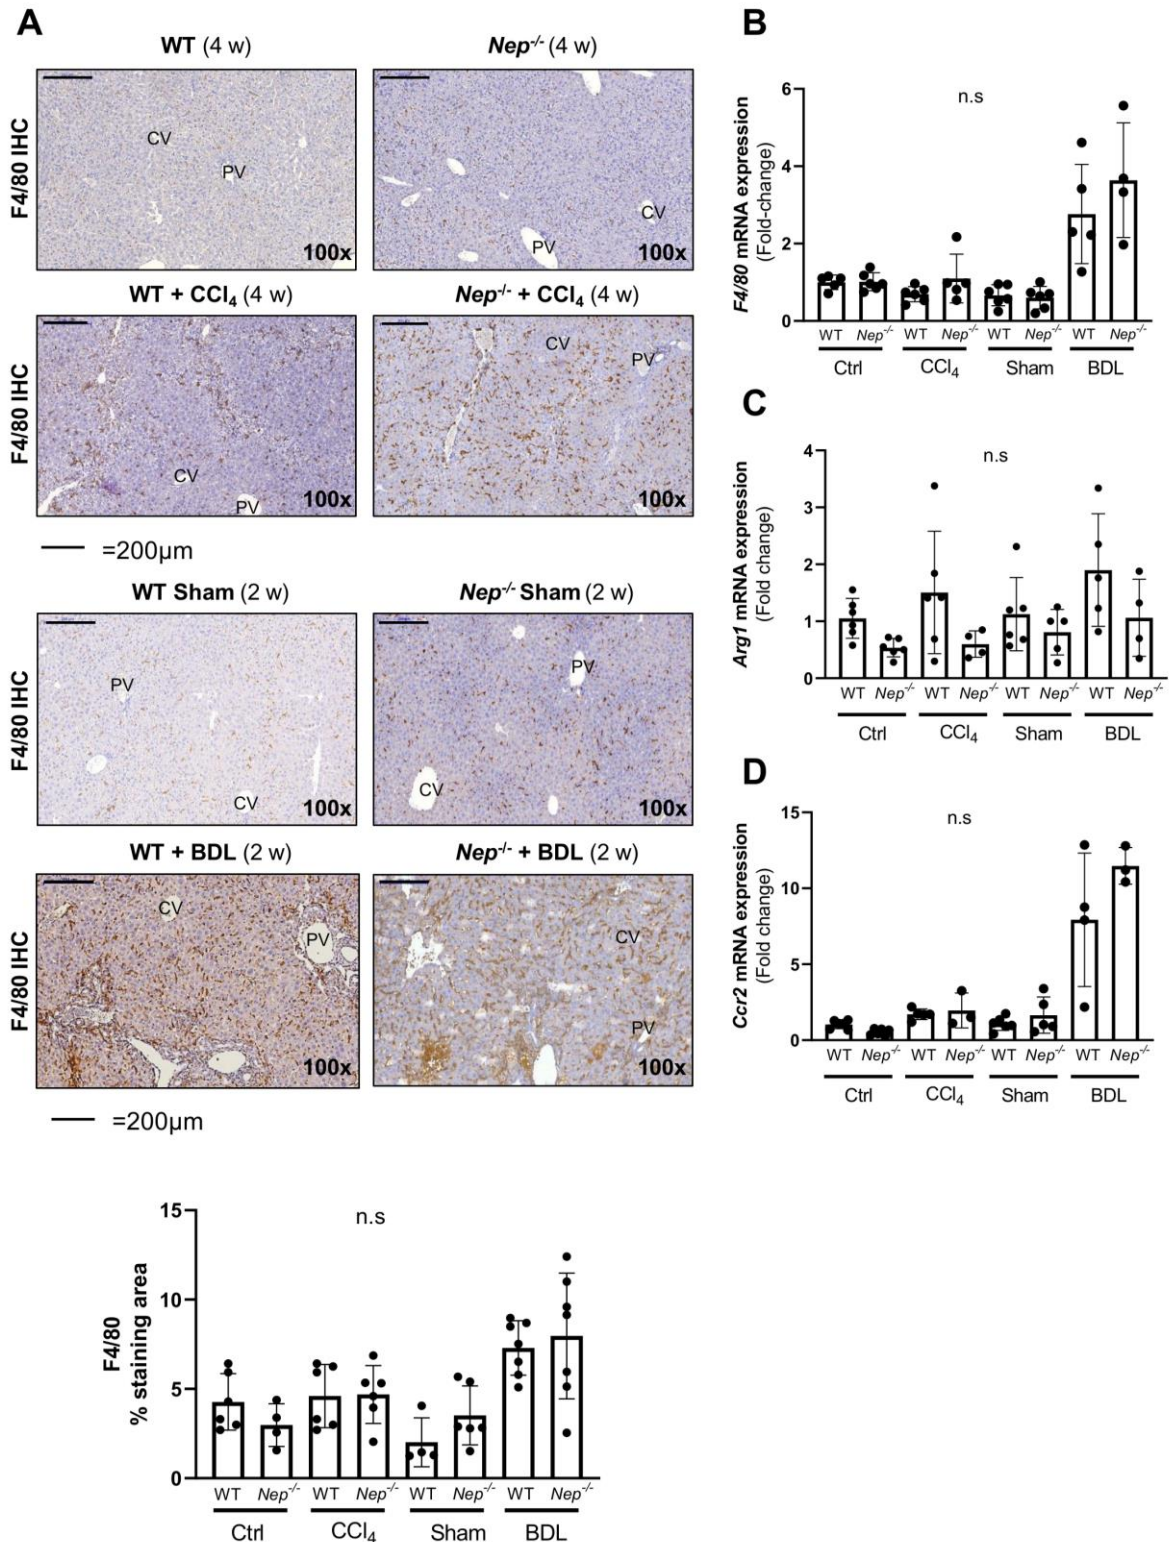

189

190 **Supplementary Figure 13. Macrophage infiltration in WT vs. *Nep*<sup>-/-</sup> livers show no**  
 191 **significant expression.** Immunohistochemistry staining of F4/80 and quantification show no  
 192 significant differences between the different treatments and/or WT vs. *Nep*<sup>-/-</sup> mice. qPCR from  
 193 liver lysates show unchanged expression of F4/80, *Arg1* (arginase 1) and *Ccr2* (chemokine  
 194 receptor 2). All data were normalized to the expression of *18sRNA*. Results are expressed as  
 195 mean ± standard error of the mean (SEM); n=4-5/group. n.s. (not significant).  
 196

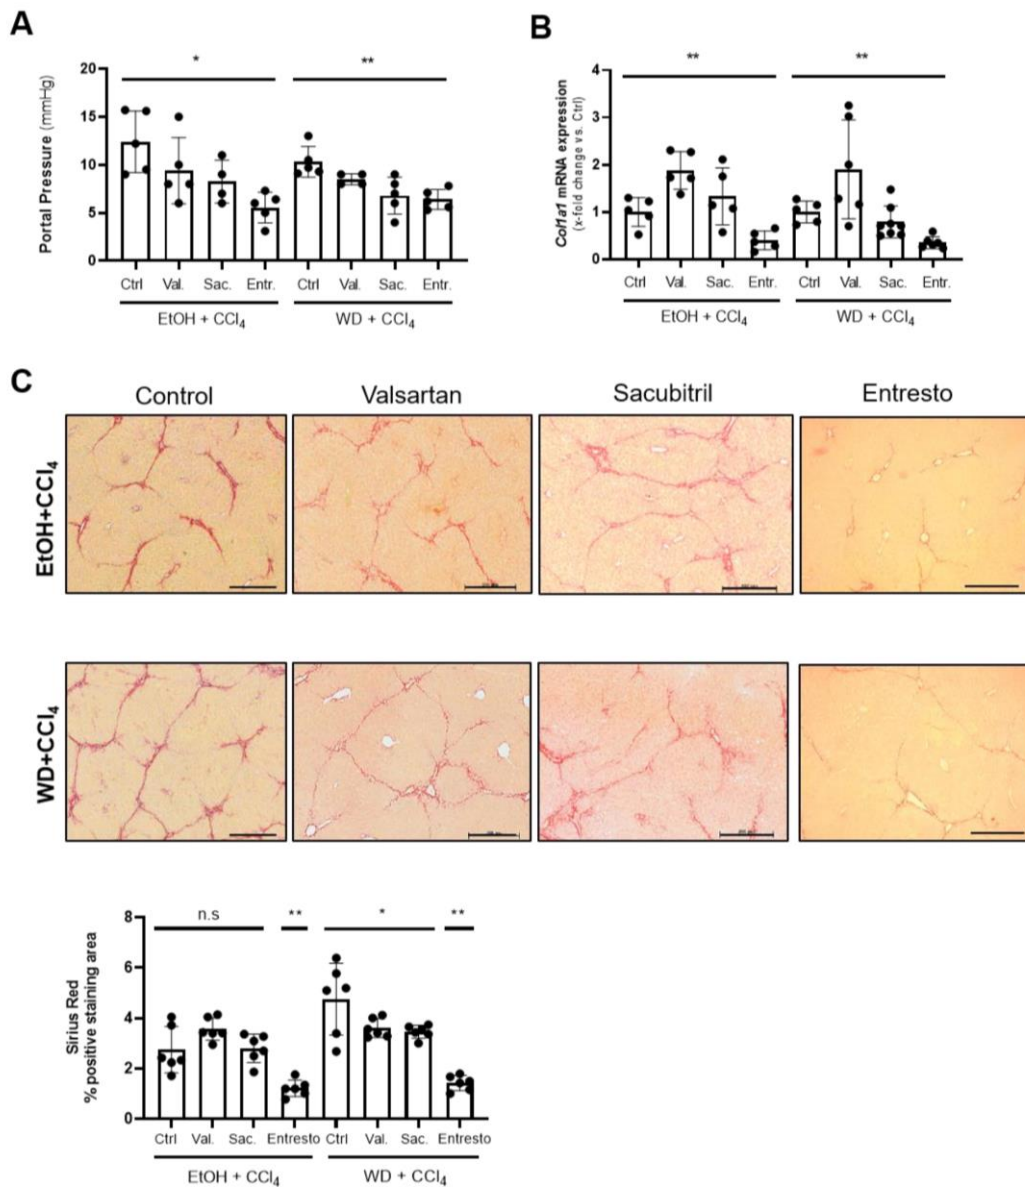

197

198 **Supplementary Figure 14. Effect of valsartan and sacubitril in the progression of liver**  
 199 **fibrosis. (A)** Portal pressure measurements of the different mice treated with either valsartan,  
 200 sacubitril and entresto compared to control mice. **(B)** *Col1a1* mRNA expression from the mice  
 201 livers treated with the different drugs. All data were normalized to the expression of *18sRNA*.  
 202 \* $p < 0.05$ , \*\* $p < 0.01$  for control mice vs. valsartan, sacubitril and Entresto mice. **(C)** Sirius red  
 203 stainings and quantification of the mice groups treated with valsartan, sacubitril and Entresto.  
 204  
 205
